# Supplementary material for: MicroRNA-497 impairs the growth of chemoresistant neuroblastoma cells by targeting cell cycle, survival and vascular permeability genes
Source: PubMed Central journal article supplement (PMC4891039; doi:10.18632/oncotarget.7005), 2016-01-25
Supplement: oncotarget-07-9271-s001.pdf [file oncotarget-07-9271-s001.pdf]

# MicroRNA-497 impairs the growth of chemoresistant neuroblastoma cells by targeting cell cycle, survival and vascular permeability genes

## Supplementary Materials

### SUPPLEMENTARY MATERIALS AND METHODS

#### Analysis of mRNA expression in human neuroblastoma samples

Gene expression data of DDR-associated genes was analyzed in primary neuroblastoma tumors from the publicly available GSE3960 ( $n = 101$ ) [1] dataset. CHEK1 levels and association with survival analysis were analyzed from the publicly available GSE45547 ( $n = 643$ ) [2] dataset.

#### 3'UTR Target Analysis

Candidate genes were selected comparing the Stage 4 MYCN-amplified tumors versus the other stages present in the study (i.e. Stage 1, 3 and 4 without MYCN amplification). The 3'untranslated region (UTR) of the candidate genes was scanned through three different miRNA-binding site prediction algorithms: TargetScan [3], PicTar [4] and miRANDA [5]. MiRNAs found to be potential regulators of at least 3 different genes and by, at least, two independent algorithms were selected for functional studies.

#### Detection of miR-497 in neuroblastoma xenografts

Tumor tissue from NB xenografts was obtained immediately after surgery and snap frozen in liquid nitrogen and stored at  $-80^{\circ}\text{C}$  until processing. Total RNA was extracted using the miRNAeasy Mini Kit (Qiagen, Las Matas, Spain). Between 0.5 and 1  $\mu\text{g}$  of total RNA was retrotranscribed using High Capacity RNA-to-cDNA Kit (Applied Biosystems, Alcobendas, Spain). In order to

avoid contamination of endogenous miR-497 from mouse tissue (e.g. stromal or blood cells) human-specific primers were designed for miR-497 precursor detection: miR-497\_forward, 5'- CTTCCCAGCACTGCTATGTG-3' and reverse, 5'- TGTCAACTTCTCCAGGATGG-3'. Equal RNA loading was confirmed using the *L27* housekeeping gene: L27-forward: 5'-AGCTGTTCATCGTGAAGAA-3' and L27-reverse, 5'-CTTGGCGATCTTCTTCTTGCC-3'.

### REFERENCES

1. Wang Q, Diskin S, Rappaport E, Attiyeh E, Mosse Y, Shue D, Seiser E, Jagannathan J, Shusterman S, Bansal M, Khazi D, Winter C, Okawa E, et al. Integrative genomics identifies distinct molecular classes of neuroblastoma and shows that multiple genes are targeted by regional alterations in DNA copy number. *Cancer Res.* 2006; 66:6050–6062.
2. Kocak H, Ackermann S, Hero B, Kahlert Y, Oberthuer A, Juraeva D, Roels F, Theissen J, Westermann F, Deubzer H, Ehemann V, Brors B, Odenthal M, et al. Hox-C9 activates the intrinsic pathway of apoptosis and is associated with spontaneous regression in neuroblastoma. *Cell Death Dis.* 2013; 4:e586.
3. Grimson A, Farh KK, Johnston WK, Garrett-Engele P, Lim LP, Bartel DP. MicroRNA targeting specificity in mammals: determinants beyond seed pairing. *Mol Cell.* 2007; 27:91–105.
4. Krek A, Grun D, Poy MN, Wolf R, Rosenberg L, Epstein EJ, MacMenamin P, da Piedade I, Gunsalus KC, Stoffel M, Rajewsky N. Combinatorial microRNA target predictions. *Nat Genet.* 2005; 37:495–500.
5. Betel D, Wilson M, Gabow A, Marks DS, Sander C. The microRNA.org resource: targets and expression. *Nucleic Acids Res.* 2008; 36:D149–153.

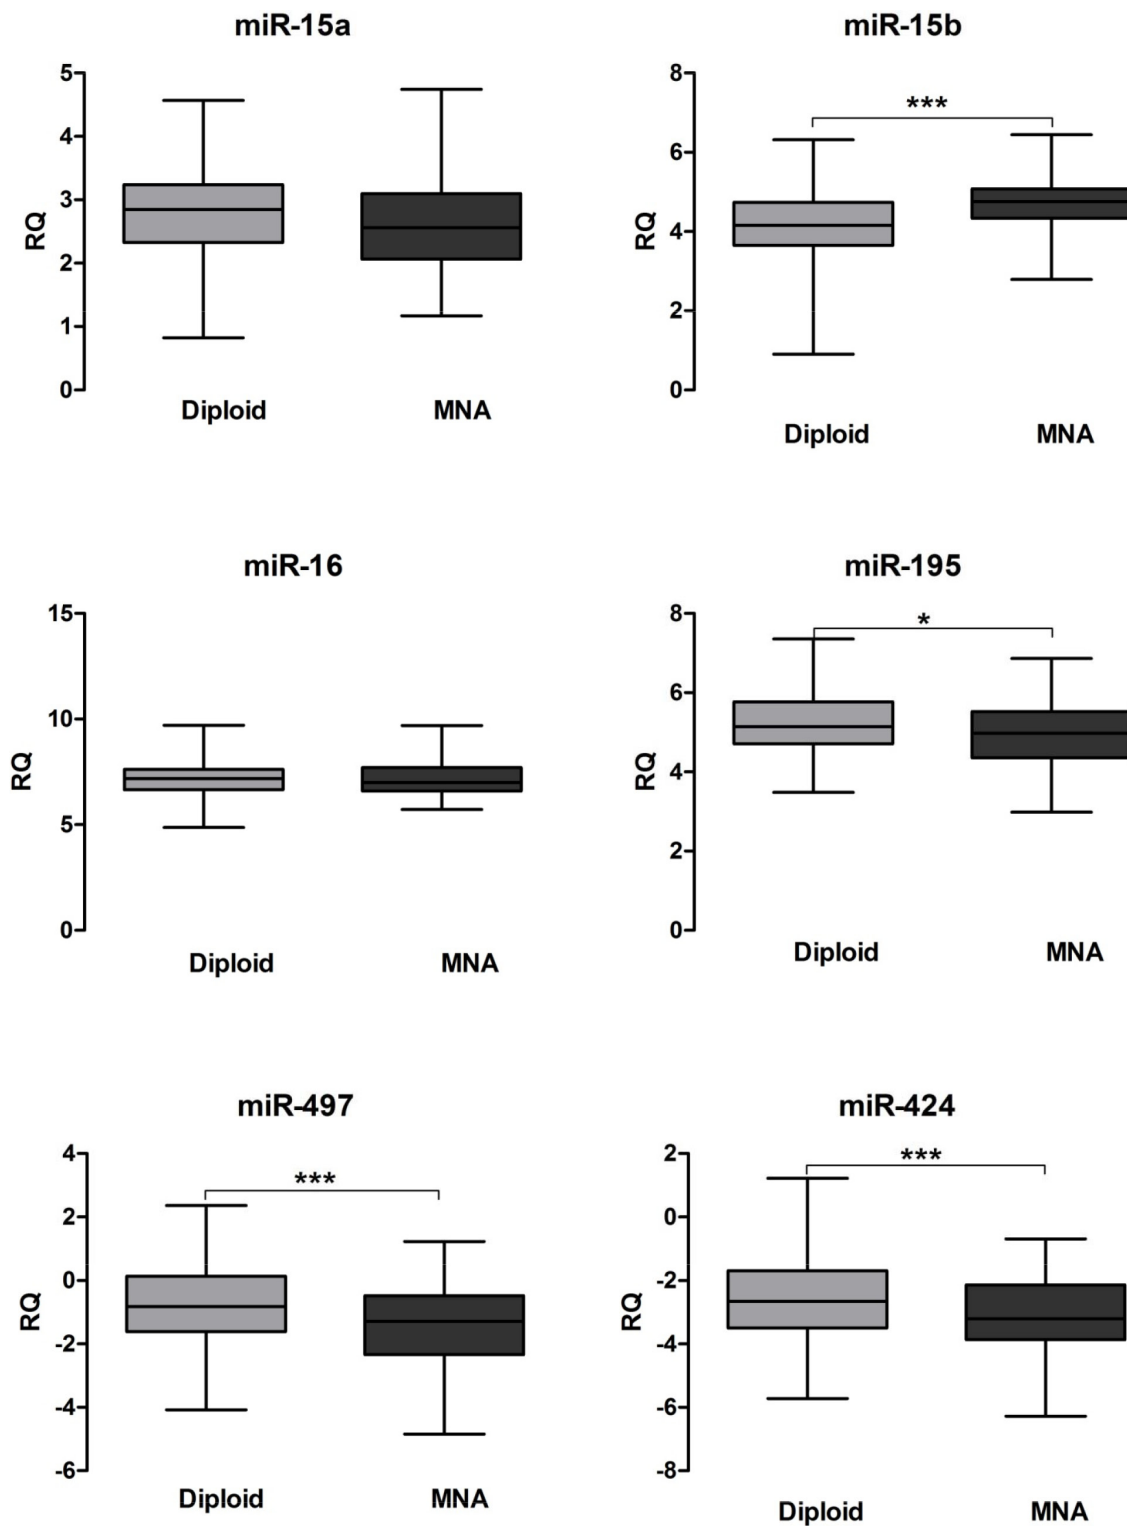

**Supplementary Figure S1: MiR-195, miR-497 and miR-424 showed reduced expression levels in MYCN-amplified tumors.** Box plots represent mir-15 family member's expression values comparing normal MYCN content (Diploid,  $n = 265$ ) versus MYCN amplified (MNA,  $n = 65$ ) tumors. RQ: Relative quantification.  $*p < 0.05$ ;  $***p < 0.001$ .



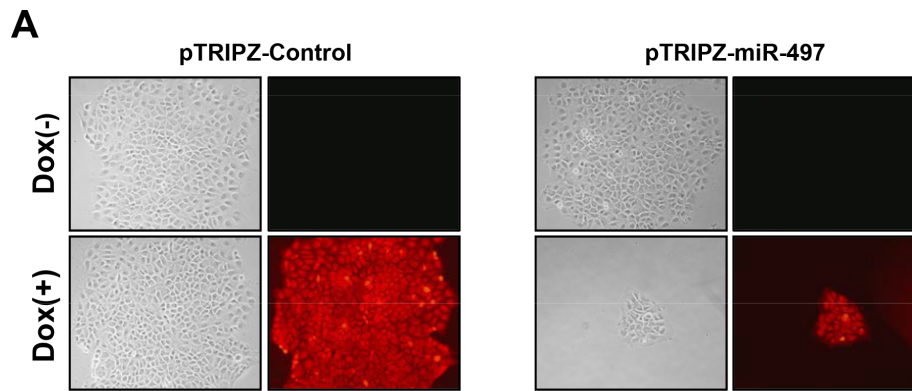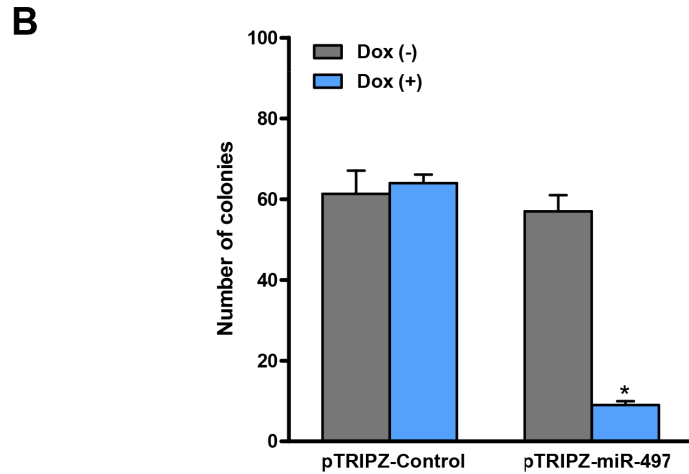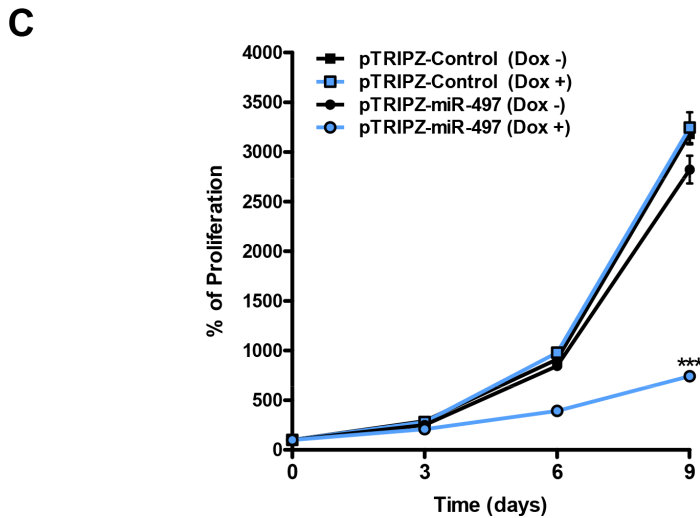

**Supplementary Figure S3: Inducible expression of miR-497 impairs colony formation and proliferation in LA1-5s cell line.** (A) Representative images of a colony-formation assay in pTRIPZ-Control or pTRIPZ-miR-497 stably-transduced LA1-5s cells treated with or without doxycycline (1  $\mu\text{g}/\text{mL}$ ) and allowed to grow for 9 days ( $n = 3$ ). The expression of TurboRFP allows the visual marking of miRNA expressing cells. (B) Colonies were stained with crystal violet, photographed and the number of colonies was quantified. (C) Proliferation time course comparing pTRIPZ-Control or pTRIPZ-miR-497 stably-transduced LA1-5s cells with or without 1  $\mu\text{g}/\text{mL}$  of doxycycline. Data represent mean  $\pm$  SEM of three independent experiments (3 replicates per condition for each experiment). \* or \*\*\* indicated statistically significant difference comparing cells treated with or without doxycycline at  $p < 0.05$  or  $p < 0.001$ , respectively.

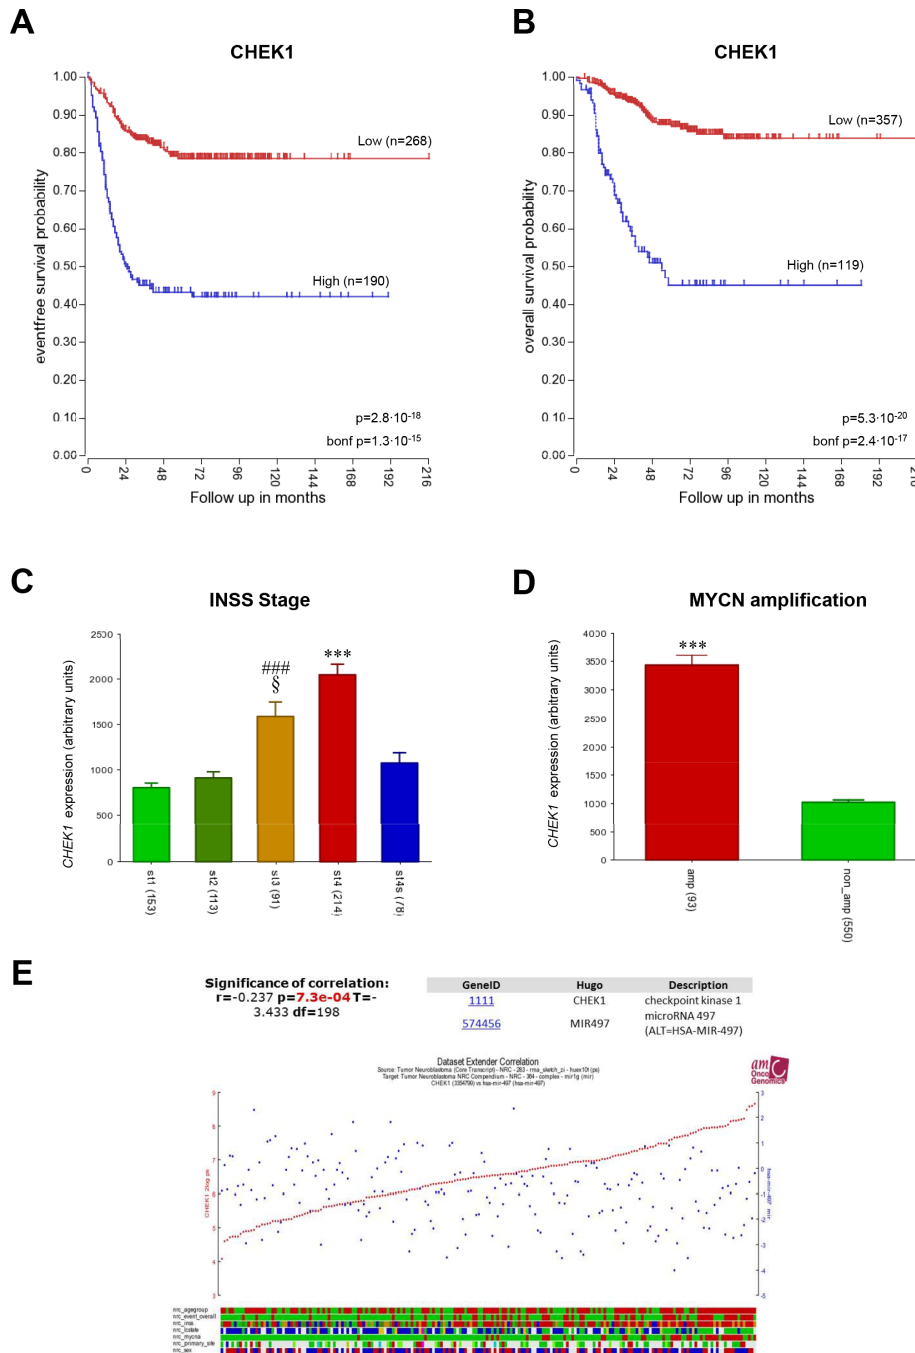

**Supplementary Figure S4: *CHEK1* is highly expressed in advanced neuroblastoma and inversely correlates with miR-497.** Kaplan-Meier progression-free (A) and overall (B) survival analysis of *CHEK1* mRNA in human NB tissues ( $n = 476$ ). (C) *CHEK1* mRNA expression according to the International Neuroblastoma Staging System (INSS). \*\*\* means  $p < 0.001$  for stage 4 versus stage 1, 2 and 4S. ### means  $p < 0.001$  for stage 3 versus stage 1. § means  $p < 0.05$  for stage 3 versus stage 2. (D) *CHEK1* mRNA expression comparing NB with genomic amplification of MYCN versus non-amplified ( $n = 643$ ). \*\*\* means  $p < 0.001$ . (E) Expression correlation between *CHEK1* mRNA and miR-497 in human NB tissue samples.

**Supplementary Table 1: DNA Damage Response/Detox Pump genes overexpressed in Stage 4 MYCN amplified NB samples**

|                    | Gene Symbol | Fold Change (*) | P Value              |
|--------------------|-------------|-----------------|----------------------|
| <b>SENSORS</b>     | H2AFX       | 2.43            | $3.9 \cdot 10^{-05}$ |
|                    | RNF8        | 4.33            | $8.6 \cdot 10^{-05}$ |
| <b>TRANSDUCERS</b> | ATM         | 1.4             | $6.8 \cdot 10^{-03}$ |
|                    | ATR         | 1.38            | $2.0 \cdot 10^{-04}$ |
| <b>EFFECTORS</b>   | XRC66       | 1.33            | $3.3 \cdot 10^{-04}$ |
|                    | PRKDC       | 1.53            | $2.4 \cdot 10^{-05}$ |
|                    | ATRX        | 1.34            | $3.0 \cdot 10^{-03}$ |
|                    | CHEK1       | 1.64            | $1.5 \cdot 10^{-04}$ |
|                    | CHEK2       | 2.04            | $4.2 \cdot 10^{-04}$ |
|                    | CDK2        | 1.44            | $1.4 \cdot 10^{-02}$ |
|                    | CDC25A      | 5.68            | $2.7 \cdot 10^{-03}$ |
|                    | SMC1A       | 1.73            | $3.5 \cdot 10^{-05}$ |
|                    | CCNB1       | 2.49            | $2.0 \cdot 10^{-04}$ |
|                    | CDK1        | 1.94            | $1.8 \cdot 10^{-03}$ |
|                    | PLK1        | 1.89            | $4.4 \cdot 10^{-05}$ |
|                    | WEE1        | 1.33            | $1.3 \cdot 10^{-02}$ |
| <b>DETOX/PUMPS</b> | CES2        | 1.51            | $5.9 \cdot 10^{-04}$ |
|                    | ABCC1       | 1.96            | $2.1 \cdot 10^{-06}$ |
|                    | ABCC4       | 2.36            | $2.5 \cdot 10^{-04}$ |
|                    | ABCC5       | 1.42            | $3.8 \cdot 10^{-02}$ |
|                    | UMPS        | 1.70            | $1.1 \cdot 10^{-04}$ |
|                    | RRM1        | 1.87            | $1.1 \cdot 10^{-05}$ |
|                    | ABCB7       | 1.56            | $6.7 \cdot 10^{-05}$ |

(\*) GSE-3960 Stage 4 MYCN amplified versus rest of stages (1, 3 and 4 MYCN non-amplified)

**Supplementary Table 2: List of microRNAs that potentially regulate 3 or more upregulated genes listed in Table 1**

| microRNA | miR-Family | Target Genes (*)                             | # Targets |
|----------|------------|----------------------------------------------|-----------|
| miR-93   | miR-17     | CDK2, CDC25A, CCNB1, WEE1, ABCC5, CES2       | 7         |
| miR-7    |            | ATRX, CHEK1, SMC1A, CDK1, ABCC1, ABCC5       | 7         |
| miR-300  | miR-154    | ATR, ATRX, CDC25A, CDK1, CCNB1, ABCC4, ABCC5 | 7         |
| miR-186  |            | CDK2, CDK1, ABCC1, ABCC5, UMPS               | 6         |
| miR-101  |            | ATRX, CCNB1, ABCC1, ABCC5, RRM1              | 6         |
| let-7e   | let-7      | RNF8, CDC25A, SMC1A, ABCC1, ABCC5            | 5         |
| miR-379  |            | CCNB1, CDK1, XRCC6, ABCC1                    | 5         |

|             |         |                            |   |
|-------------|---------|----------------------------|---|
| miR-490-3p  |         | CDK2, CDK1 ABCC4, ABCC5    | 5 |
| miR-421     | miR-95  | ATM, CHEK1, ABCC4, ABCC5   | 4 |
| miR-410     | miR-154 | CDK2, CDK1, CCNB1, ABCC5   | 4 |
| miR-340-5p  |         | CDK2, CDK1, CCNB1, ABCC5   | 4 |
| miR-23a     | miR-23  | PLK1, ABCC4, ABCC5, UMPS   | 4 |
| miR-200b    | miR-200 | CDK2, CDK1, CDC25A, ABCC1  | 4 |
| miR-497     | miR-15  | CHEK1, CDC25A, WEE1, ABCC5 | 4 |
| miR-24      |         | H2AFX, RNF8, CDC25A, CES2  | 4 |
| miR-146a    | miR-146 | ATR, CDK1, ABCC5, UMPS     | 4 |
| miR-320a    | miR-320 | CHEK1, ATRX, ABCC5, UMPS   | 4 |
| miR-125a-3p | miR-125 | CES2, ABCC4, ABCC5         | 4 |
| miR-590-3p  |         | CCNB1, CDK1, ABCC5         | 4 |
| miR-543     | miR-329 | CDK1, CES2, ABCC4          | 3 |
| miR-505     |         | CHEK1, ABCC4, ABCC5        | 3 |
| miR-34a     | miR-34  | CDC25A, ABCC1, ABCC5       | 3 |
| miR-339-5p  |         | CDK2, CDC25A, RRM1         | 3 |
| miR-335     |         | CDK2, CDK1, ABCC5          | 3 |
| miR-185     |         | ABCC1, ABCC5, UMPS         | 3 |
| miR-140-5p  |         | CDK1, CCNB1, ABCC4         | 3 |
| miR-129     |         | CDK1, CES2, ABCC5          | 3 |
| miR-181b    | miR-181 | RNF8, CDK1, CCNB1          | 3 |

(\*) Target analysis predicted, at least, by two independent algorithms

### Supplementary Table 3: miR-15 family members

| miRNA    | Accession    | Sequence                | Locus   | Clustered miRNAs                               |
|----------|--------------|-------------------------|---------|------------------------------------------------|
| miR-15a  | MIMAT0000068 | UAGCAGCACAUA AUGGUUUGUG | 13q14.2 | miR-16-1                                       |
| miR-15b  | MIMAT0000417 | UAGCAGCACAUCAUGGUUUACA  | 3q25.33 | miR-16-2                                       |
| miR-16-1 | MIMAT0000069 | UAGCAGCACGUAAAUAUUGGCG  | 13q14.2 | miR-15a                                        |
| miR-16-2 | MIMAT0000069 | UAGCAGCACGUAAAUAUUGGCG  | 3q25.33 | miR-15b                                        |
| miR-195  | MIMAT0000461 | UAGCAGCACAGAAAUAUUGGC   | 17p13.1 | miR-497                                        |
| miR-497  | MIMAT0002820 | CAGCAGCACACUGUGGUUUGU   | 17p13.1 | miR-195                                        |
| miR-424  | MIMAT0001341 | CAGCAGCAAUUCAUGUUUUGAA  | Xq26.2  | miR-503 miR-542 miR-450a-2 miR-450a-1 miR-450b |

**Supplementary Table 4: Patient characteristics**

| Variable               | <i>n</i> (%) |
|------------------------|--------------|
| INSS Stage             |              |
| 1                      | 41 (11.23)   |
| 2                      | 100 (27.39)  |
| 3                      | 53 (14.52)   |
| 4                      | 142 (38.90)  |
| 4s                     | 29 (7.94)    |
| MYCN status*           |              |
| Amplified              | 65 (19.69)   |
| Non-amplified          | 265 (80.31)  |
| Chromosomal imbalance* |              |
| -11q                   | 28 (26.92)   |
| -1p                    | 51 (36.42)   |
| +17q                   | 126 (54.31)  |

INSS:International Neuroblastoma Staging System.

\*Note that there is no molecular profile for each sample.

**Supplementary Table 5: Primers**

| Gene   | Primer sequence (5' to 3') |
|--------|----------------------------|
| AKT3   | Fw: GAACGACCAAAGCCAAACAC   |
|        | Rv: TGGGTTGTAGAGGCATCCAT   |
| WEE1   | Fw: CACACGCCCAAGAGTTTGC    |
|        | Rv: GAGGAGTCTGTGCGACATCA   |
| CHEK1  | Fw: GACATTCAGAGGGGCAGGAC   |
|        | Rv: GCACCTCGGCGGACTG       |
| CDC25A | Fw: CCCAGCTCGGATGCTTTCC    |
|        | Rv: TCACAGGTGACTGGGGTGTA   |
| BCL-2  | Fw: TCTTTGAGTTCGGTGGGGTC   |
|        | Rv: GTTCCACAAAGGCATCCCAGC  |
| ABCC5  | Fw: TGTTGTTAGTGCTGGGCCTC   |
|        | Rv: TTGATGAGCTCACCCAGGGAT  |
| L27    | Fw: AGCTGTCATCGTGAAGAA     |
|        | Rv: CTTGGCGATCTTCTTCTTGCC  |
| VEGFA  | Fw: GGGCCTCCGAAACCATGAA    |
|        | Rv: GGGACCACTTGGCATGGTG    |
